**A cerebellum-like circuit in the lateral line system of fish  
cancels mechanosensory input associated with its own movements**

Krista E. Perks<sup>1,2,3,4</sup>, Anna Krotinger<sup>3,4</sup>, and David Bodznick<sup>3,4</sup>

<sup>1</sup> Neurosciences Department and Zuckermann Institute, Columbia University, New York, NY

<sup>2</sup> Junior Fellow, Simons Foundation Society of Fellows

<sup>3</sup> Neuroscience & Behavior Program and Department of Biology, Wesleyan University, Middletown, CT

<sup>4</sup> Marine Biological Laboratory, Woods Hole, MA

Keywords:

cerebellum-like

mechanosensory lateral line

predictive cancellation

reafference

elasmobranch

cerebellum

Corresponding Author:

Krista Perks

kep2142@columbia.edu

## SUMMARY STATEMENT:

By examining the function of a primitive cerebellum-like structure, our results contribute to ongoing efforts at understanding, from an evolutionary perspective, the functional diversity of the vertebrate cerebellum in animal behavior.

## ABSTRACT

An animal's own movement exerts a profound impact on sensory input to its nervous system. Peripheral sensory receptors do not distinguish externally generated stimuli from stimuli generated by an animal's own behavior (reafference) -- though the animal often must. One way that nervous systems can solve this problem is to provide movement-related signals (copies of motor commands and sensory feedback) to sensory systems, which can then be used to generate predictions that oppose or cancel out sensory responses to reafference. Here, we study the use of movement-related signals to generate sensory predictions in the lateral line medial octavolateralis nucleus (MON) of the little skate. In the MON, mechanoreceptive afferents synapse on output neurons that also receive movement-related signals from central sources, via a granule cell parallel fiber system. This parallel fiber system organization is characteristic of a set of so-called cerebellum-like structures. Cerebellum-like structures have been shown to support predictive cancellation of reafference in the electrosensory systems of fish and the auditory system of mice. Here, we provide evidence that the parallel fiber system in the MON can generate predictions that are negative images of (and therefore cancel) sensory input associated with respiratory and fin movements. The MON, found in most aquatic vertebrates, is probably one of the most primitive cerebellum-like structures and a starting point for cerebellar evolution. The results of this study contribute to a growing body of work that uses an evolutionary perspective on the vertebrate cerebellum to understand its functional diversity in animal behavior.

## INTRODUCTION

Sensory systems face the particular challenge that an animal's own motor acts generate sensory stimuli (called refference) that can obscure and distract from externally generated signals of interest. In some cases, inhibitory motor-related signals are sufficient to gate out brief, stereotyped refference from the system (Bell and Grant, 1989; Kim et al., 2017; Kim et al., 2015; Poulet and Hedwig, 2003). However, animals and environments are varied and complex, and associations between signals and behavior appear, change, and disappear over time. Studies of the electrosensory systems of three phylogenetically distinct taxa of fish have provided unique insights into the general issue of how responses to expected stimuli such as refference are eliminated by predictions based on central signals associated with the animal's own movements and behavior (Bastian, 1995; Bell et al., 1981; Montgomery and Bodznick, 1994; Requarth and Sawtell, 2014). The first stage of processing in this and several other sensory systems occurs in hindbrain structures that share numerous similarities with the cerebellum in terms of their evolution, development, patterns of gene expression, and circuitry and are therefore termed "cerebellum-like" (Bell et al., 1997a; Bell, 2002; Bell et al., 2008, Suriano and Bodznick, 2018).

A distinguishing feature of a class of cerebellum-like sensory structures is the integration of direct input from peripheral sensory receptors with a diverse array of sensory and motor signals conveyed by a granule cell – parallel fiber system (Fig. 2A). *In vitro* and *in vivo* electrophysiological studies and computational modeling of cerebellum-like electrosensory structures all point to a common functional logic for this cerebellum-like organization. In electrosensory and auditory systems, the parallel fiber system continually generates and updates sensory predictions based on associations between central signals and peripheral sensory inputs (Bastian, 1995; Bell et al., 1981; Montgomery and Bodznick, 1994; Singla et al., 2017). These predictions are generated based on anti-Hebbian synaptic plasticity rules, sometimes termed decorrelation learning rules, and are observed in the spiking and subthreshold membrane potential of single principal neurons as a response to parallel fiber input that is negatively correlated with the responses driven by expected sensory input (Bastian, 1996; Bell et al., 1993; Bell et al., 1997b; Bodznick et al., 1999; Harvey-Girard et al., 2010; Montgomery and Bodznick, 1994; Nelson and Paulin, 1995; Roberts and Bell, 2000). This *negative image* or *cancellation signal*, when subtracted from the neural response, therefore eliminates responses to expected sensory input while maintaining sensitivity to un-expected stimuli (Enikolopov et al., 2018). Cancellation of refference by the electrosensory cerebellum-like circuit is therefore an active memory-based process.

Although they have evolved independently, the electrosensory systems of elasmobranch, mormyriiform and gymnotiform fishes share important similarities in the structure and function of their cerebellum-like electrosensory structures at the first stage of sensory processing (Bell, 2002; Bullock et al., 1983; Finger et al., 1986; Montgomery et al., 2012). These observations suggest that

the evolutionarily convergent cerebellum-like circuitry in each case provides a mechanism for generating predictions based on the animal's own behavior that eliminate responses to expected sensory input. Consistent with this hypothesis, a recent study of the dorsal cochlear nucleus in mice demonstrates that the cerebellum-like circuit at this first central stage of auditory processing is associated with the elimination of refference from the output of the dorsal cochlear nucleus (Oertel and Young, 2004; Singla et al., 2017).

The medial octavolateral nucleus (MON) found in most aquatic vertebrates may be the most primitive cerebellum-like structure. The MON is found in the majority of anamniotic vertebrates where it is the primary termination site for lateral line neuromast afferents (New et al., 1996). Neuromasts are distributed either on the surface of the skin or within sub-dermal canals (Fig. 1A). The sole efferent cell type of the MON, which projects to the midbrain, are Ascending Efferent Neurons (AENs; in some species these are called crest cells) (Fig. 1B) (Boord and Northcutt, 1982). Basilar AEN dendrites are contacted by primary afferent fibers of lateral line neuromasts that form a somatotopic map in the deep layers of MON (Bodznick and Northcutt, 1980; Bodznick and Schmidt, 1984). Spine-covered apical AEN dendrites extend into an overlying molecular layer where they are contacted by highly numerous inputs from the thin, unmyelinated axons of granule cells. These axons course long distances through a molecular layer, similar to the parallel fibers in the molecular layer of the cerebellar cortex. Parallel fibers arise from granule cells in the lateral granular area (continuous with the granule cell mass that gives rise to the parallel fibers of the electrosensory molecular layer in these fish) (Schmidt and Bodznick, 1987). The parallel fiber system is thought to convey corollary discharge as well as proprioceptive input signals to the AENs.

As in the electrosensory and auditory systems, responses of mechanosensory receptors to refference generated by movements (such as those associated with ventilation or swimming) can obscure the response to externally generated signals of interest. Unlike electroreceptors, lateral line mechanoreceptors receive inhibitory efferent innervation (Roberts and Russell, 1972; Russell, 1971). This could reduce refference by turning off the receptors during behavior, but the efferents appear only to be activated during very vigorous behaviors that threaten to overdrive receptors (Bodznick, 1989; Roberts and Russell, 1972). Requisite movements of behaviors such as ventilation and swimming cause self-stimulation that drive lateral line primary afferent responses (Montgomery et al., 1996, Russell and Roberts, 1974, Palmer et al., 2005, Ayali et al., 2009, Mensinger et al., 2018). However, second-order cells are not driven by the same self-stimulation, at least in the case of ventilation (Montgomery et al. 1996). In theory, inhibitory motor-related signals could gate out brief, stereotyped refferent input to second order cells, however many behaviors (such as swimming and ventilation) generate ongoing self-stimulation. Prolonged inhibition during these ongoing behaviors seems unlikely -- responses to important external stimuli would be inhibited as well. A recent study in

toadfish indeed found that the lateral line system remains sensitive to external stimuli in spite of self-stimulation generated by swimming (Mensing et al., 2018). It appears that a more dynamic filter would be useful under most circumstances and evidence for predictive cancellation of reafference was briefly reported in the MON of the teleost scorpion fish, but this has not been further studied (Montgomery and Bodznick, 1994).

Here we set out to test further the hypothesis that the cerebellum-like circuitry of the MON supports the generation of predictions for expected sensory input based on behavior-related signals. We recorded the spiking activity of AENs in the MON of an elasmobranch fish, the skate (*Leucoraja erinacea*) while manipulating the relationship between external stimuli and signals associated with the animal's own movements. We found that AENs reduce their response to external stimuli time-locked to movement-related signals and demonstrate negative images of such expected sensory-driven responses. Critically, we find that negative image formation depends on coupling between the sensory stimulus and behavior-related signals and is not observed in the spiking responses of afferent input to AENs. Together, these results support the model of a conserved computation implemented by cerebellum-like circuits across vertebrates.

## METHODS

### *Animals and Surgery.*

For all experiments we used adult, wild-caught little skates (*Leucoraja erinacea*) of either sex; a total of 19 skates were used in this study. Animals were obtained from the Long Island Sound and housed in local facilities at Wesleyan University (Middletown, CT) or Marine Biological Laboratories (Woods Hole, MA). Skates were housed in groups (no more than 6 fish per cubic meter of water) in tanks where they were maintained around 12-14 degrees Celsius (either artificial sea water or natural sea water) and maintained on a daily diet of squid. For all experiments, animals were first anesthetized by immersion in 0.04% benzocaine and surgical procedures were performed as previously described (Duman and Bodznick, 1996). The brains were exposed by removal of the overlying cartilage, and decerebrated by diencephalic section. The skates were either fully paralyzed by injection with tubocurarine (0.1 mg kg<sup>-1</sup>, i.v., Sigma) (to allow the manipulation of body posture), or partially paralyzed by destroying the spinal cord to eliminate trunk and tail movements but leave normal breathing movements intact (for the ventilation experimental condition as described below). After surgery, the fish were transferred to a Plexiglas experimental tank of cold seawater (9°C), and positioned with a Plexiglas head holder so that the cranial opening was just above the water surface. A gentle flow of seawater (0.1-0.4 l min<sup>-1</sup>) was directed into the mouth as an extra support to ventilation. All procedures followed NIH guidelines for the care and use of experimental animals and were approved by the Animal Care and Use Committees of Wesleyan University and the Marine

Biological Laboratory.

### *Electrophysiological Methods.*

AEN unit activity was recorded extracellularly using Pt–black-tipped indium electrodes (2–7M $\Omega$ , 1–2 $\mu$ m tip), which provided a high signal-to-noise ratio for single unit isolation in this region. Afferent unit activity was recorded extracellularly using pulled sharp glass electrodes (20M $\Omega$ ) filled with 4M NaCl. All neural signals were filtered, amplified and then acquired using the Cambridge Electronic Designs 1401 ADC and Spike2 software (CED, Cambridge, UK).

The mechanosensory MON is located ventral to the electrosensory DON in skates (Fig. 1B). Recordings of individual AENs in the MON were targeted by first identifying surface landmarks characteristic of the DON and then advancing the electrode (perpendicular to the dorsal surface) until responses to an electrosensory dipole stimulus ceased. Once in MON, the electrode was slowly advanced until well-isolated spikes were detected on the oscilloscope trace of the raw waveform (this signal was also monitored acoustically by sending it through a speaker). All AENs were positively identified by their short-latency (2–3msec) antidromic activation by electrical stimulation of the contralateral medial mesencephalic nucleus (MMN), which is the AEN target region located in the caudal mesencephalon just rostral to the corpus cerebellum (Fig. 1B). The AENs in MON respond to mechanosensory but not electrosensory stimuli, which provided additional confirmation of identity.

Mechanosensory afferents were recorded with sharp glass electrodes placed in the intracranial portion of the posterior lateral line nerve before its point of entry into the hindbrain. Mechanosensory afferents were identified by their robust responses to mechanosensory stimuli and lack of responses to electrosensory stimuli.

### *Experimental Procedures.*

Throughout the study, the experimental unit was a single cell (AEN or afferent) from which spiking activity was continuously recorded. Each *experiment* comprised *trials* that were split into three main *periods* (Fig. 3A): (1) a *prestimulus* period; (2) a *stimulus* period during which a local mechanosensory stimulus was triggered by trial onset; and (3) a *poststimulus* period. Throughout each experiment, single trials were triggered by either: (1) signals associated with the animal's own movement/behavior (*paired* condition) or (2) an internal clock (*freerun* condition). 5/27 AENs were stable enough to be recorded under both the paired and the freerun experimental condition (as reported in the Results). 22/27 AENs were recorded only in the paired experimental condition. To trigger trial onset for each experiment in the paired condition, we used either: (1) the respiratory movements of ventilation or (2) externally imposed swimming movements of the fin that could provide proprioceptive signals or spatially broad mechanosensory reafference related to behaviors such as swimming (Fig. 2B).

We monitored the respiratory movements of ventilation with a force transducer placed against the skin over the branchial chamber in partially paralyzed skates. Externally imposed (passive) fin movements were generated in fully paralyzed skates by attaching a soft plastic clamp to the ipsilateral pectoral fin, which was then connected to an arm extending from a servo motor slaved to a sinusoidal function generator and triggered by an internal clock.

Each ventilation cycle had a median period of 2.93sec (interquartile range, IQR = 1.96 - 3.62; n=21 paired experiments in 21 AENs). In experiments in which the fin was artificially raised and lowered to mimic swimming movements, the fin lift interval (triggered by an internal clock) was set to a slightly longer duration of 4-6sec to minimize turbulent water disturbance (n = 6 paired experiments in 6 AENs). The speed and amplitude of artificial fin lifts were titrated to avoid excessive modulation of baseline spike rates in AENs, which were 1.8 (1.5 – 2.4) Hz for the 6 AENs in this condition. AEN spike rates were 1.5Hz (1.1 – 2.3; n=21 cells) under the ventilation condition. The difference in baseline firing rates between these two experimental conditions was not significant (Mann Whitney U = 55; p=0.33; n1 = 21 AENs in ventilation condition and n2 = 6 AENs in fin lift condition).

All cells used in this study had receptive fields localized to the dorsal surface of the skate. During the stimulation period, a mechanosensory stimulus was delivered by either a touch of the skin with a small rod or by a small steady stream of water directed toward the skin surface. The stimulus was attached to an arm extending from a servo motor slaved to a sinusoidal function generator. A single sinusoidal cycle was triggered by the onset of each trial such that on each trial the stimulus moved into and then back out of the receptive field of the single unit being recorded. To test the main hypothesis of this study, we chose whichever method (water flow or touch) elicited maximal AEN spike rate modulation from the recorded AEN and we did not distinguish between these two variations of stimulus delivery in the results. We know from extensive work in the electrosensory systems that, although coincident activity is a requirement for changes in molecular layer synaptic strength underlying the adaptive filter mechanism, the results do not qualitatively differ based on the way in which spiking responses are evoked. Even direct intracellular current injection provides changes in spiking that are sufficient for the generation of cancellation signals (Bell et al 1997, Bodznick and Montgomery 1999, Bertetto 2007, Zhang and Bodznick 2010, Kennedy et al 2014, Muller et al, 2019).

#### *Experimental periods, durations and numbers of trials.*

As described above, each experiment with an AEN included three periods (*prestimulus*, *stimulus* and *poststimulus*; Fig. 3A). Each period included a varying number trials and inter-trial intervals. In the ventilation-triggered paired experimental condition, the inter-trial interval varied during each experiment because trial onset was determined by the animal's own behavior. However, for analysis purposes the trial duration was set to a constant value across trials in a single experiment.



During the stimulation period, the mechanosensory stimulus was triggered by trial onset and moved into and then out of the receptive field of the recorded neuron. The period of this stimulus movement itself often approached the duration of the inter-trial interval. Additionally, water movement in the tank following mechanosensory stimulation continued to modulate spiking activity and meant that stimulus offset could not be well-defined by the cessation of the overt stimulus movement. For each cell, the spiking response window was triggered at trial onset and the response duration was set as the average period of modulated spiking for the cell, which varied from cell-to-cell and with the different stimuli used. Across paired experiments, the median trial duration used was 1.5sec (1-6 min-max;  $n = 33$  paired experiments in 33 cells – afferents and AENs).

For different experiments there was also some variability in the number of trials per period due to such things as the stability of the recording. During the prestimulus period, all recorded trials were used to get an estimate of the prestimulus spiking response. The number of prestimulus trials obtained for each experiment ranged from 12-425 (min-max) with a median 117 (76-189 IQR) ( $n = 44$  experiments in 36 cells – afferents and AENs). The “initial” and “final” stimulus-driven spiking responses were estimated using the first 75 and the last 75 trials of the stimulus period, respectively (dark green and light green vertical lines in Fig. 3A). The poststimulus spiking response was estimated using the first 75 poststimulus trials (purple vertical line in Fig. 3A). Results were qualitatively the same whether we performed analyses using 50, 75, or 100 trials to estimate the responses in each period. In 6 out of 44 total experiments (one in each of 6 different cells) the cell was not held long enough to obtain 75 trials in the poststimulus period; for these experiments all trials in the poststimulus period were used to estimate the poststimulus spiking response. In 8 out of 44 total experiments (one in each of 8 different cells) the stimulus period was shorter than 150 trials; for these experiments the stimulus period was divided in half to estimate the initial and final stimulus spiking responses. Across all 44 experiments (conducted in 36 total cells – afferents and AENs), the number of trials in the stimulus period ranged from 91-1051 trials (min-max) with a median 224 (188-346 IQR) trials.

#### *Data Processing and Analysis.*

*Spike times:* Spike times were extracted from raw recordings and all analyses were performed using custom-written scripts for Python (data and custom written analysis routines formatted for Python jupyter notebook are available upon request or via the open source repository G-Node at: *[this repository will be made public with an associated DOI upon acceptance for publication. For now, analysis routines and raw results have been uploaded with this submission as supplemental material for review if desired]*). For 24 out of the total 27 recorded AENs and all 9 recorded afferents, the signal-to-noise ratio of the raw signal was high enough that simple peak detection was enough to extract all spike times. For three of the AENs, level detection alone was insufficient and SpykingCircus (Yger et al., 2018; an open source Python platform for spike sorting) was instead used



to extract spike times.

*Spiking responses:* The critical test of the central hypothesis is whether and how spiking responses changed during and after the stimulation period. For each trial we quantified the spiking responses in two ways: 1) as an average spike rate (as described in the results), and 2) as an instantaneous spike density function. For a given cell we then averaged across trials within a given period of an experiment to get the trial-averaged spiking response for that period within that experiment. To calculate the spike density functions we convolved the spike train on each trial with a normalized Gaussian kernel. The bandwidth of the kernel was optimized to spiking activity during the prestimulus period using standard analytical methods (Shimazaki and Shinomoto, 2010). The optimum Gaussian kernel bandwidth (tau) for AEN experiments was 0.06 (0.042-0.077 IQR; n = 35 experiments in 27 cells) and for afferents was 0.06 (0.042-0.198 IQR; n = 9 experiments in 9 cells).

### *Statistics.*

The results reported in this study were obtained by analyzing data from a total of 27 individual AEN units (from 16 skates) and 9 individual afferent units (from 3 skates). From individual skates, 1-4 (min-max) AENs were recorded and 2-3 (min-max) afferents were recorded. AENs and afferents were not recorded in the same skate. When multiple units were recorded from the same animal they were often recorded on different days, sometimes several days apart. Individual neurons are considered independent samples in this study. Data are never grouped by animal identity and we did not test animal identity as a factor in any of the effects reported here.

All 27 AENs were tested in the paired experimental condition. Some additional experimental conditions discussed in the Results were only achieved in a subset of the AENs. For all comparisons and summary statistics presented in the paper we report the exact number of cells tested in the given condition. For each comparison, the number of experiments equals the number of cells unless explicitly stated otherwise. Throughout the text, population data are summarized as the median (50% quantile) and interquartile range (IQR; 25% - 75% quantiles), again with a value 'n' reporting the sample size of the specific set of cells in question.

As discussed in the Introduction, the central hypothesis of this study was that the cerebellum-like circuitry of the MON enables AENs to generate a cancellation signal to afferent mechanosensory stimulation when the afferent input is time-locked to the skate's own movements/behavior. This cancellation signal would be revealed through: (1) changes in the AEN poststimulus spiking response relative to the prestimulus response (or negative image); and (2) changes in the final stimulus-driven response compared to the initial stimulus-driven response. Therefore, we have defined in advance this set of planned within-cell comparisons. Absolute effect sizes are reported throughout. For within-cell comparisons we tested the statistical significance of effect sizes using the two-tailed Wilcoxon signed-rank test. Results were considered significant if the statistical test returned a p-value < 0.05 (unless a different criteria is explicitly stated otherwise). For each two-tailed within-cell comparison, we report

the raw W test statistic. For sample sizes >15 we report the p-value calculated by the approximate standard normal distribution. For sample sizes <15 the approximate standard normal distribution is no longer accurate and we instead report the critical W value at  $\alpha = 0.05$  for the given sample size (with a value 'n' reporting the sample size of the population in which the given comparison is being made).

We report the results of non-parametric tests throughout due to overall small sample sizes and the failure of some of the reported data distributions to pass the test of normality (D'Agostino's K-squared test result at  $p < 0.05$ ). All of the reported data distributions were homoscedastic (Bartlett's test for equal variances; all results  $p > 0.47$ ).

*Figures.* Graphical representations of the data/results were generated in custom Python routines and saved directly to .eps files. These vectorized graphics were then imported to Corel Draw for construction of the final figures as shown. Scripts used to generate the original images were written in open source software and are available upon request or via G-Node at: *[this repository will be made public with an associated DOI upon acceptance for publication. For now, analysis routines and raw results have been uploaded with this submission as supplemental material for review if desired]*.

## RESULTS

We hypothesize that the cerebellum-like circuitry of the MON enables AENs to generate cancellation signals for predictable sensory input that is associated with the movements of behaviors (Bodznick and Montgomery, 1994, Bodznick et al., 1999; Hjelmstad et al., 1996; Schmidt and Bodznick, 1987). To test this central hypothesis, we examined whether spiking responses changed during and after a period of repeated stimulus presentation paired with movement-related signals. Under this 'paired' experimental condition (see methods for more detail), a cancellation signal would be revealed through: (1) changes in the AEN poststimulus spiking response relative to the prestimulus response; and (2) changes in the final stimulus-driven response compared to the initial stimulus-driven response. We examined changes in the magnitude of the spiking response and the temporal specificity of these effects.

Throughout each experiment in the paired condition, trial onset was triggered by one of two signals associated with ventilation or swimming movements (Fig. 2B; as described in Methods). Based on previous literature in the electrosensory system, proprioceptive signals and motor commands associated with both ventilation and proprioceptive signals and sensory feedback signals associated with fin movements are expected to provide a basis for the generation of cancellation signals (Schmidt and Bodznick, 1987; Bodznick and Montgomery, 1994). An example cell from each condition is shown in Fig. 3A&B. Overall, the results obtained under these two conditions were not significantly

different from each other (by two-tailed Mann Whitney test;  $n_1=21$  AENs in ventilation condition;  $n_2=6$  AENs in fin lift condition) and have been combined for all analyses (though group identity is indicated for visualization in Figures). In the prestimulus period, AENs had very low spike rates of 1.6 Hz (1.2 – 2.4;  $n=27$  cells). During the stimulus period, we introduced a mechanosensory stimulus triggered by the onset of each trial. In general, spiking activity appeared modulated throughout much of the duration of each trial during this period (see example cells in Figs. 3&5). We first averaged across each trial to get an estimate of the trial spike rate during each experimental period for each cell (as described in the Methods). Stimulation significantly increased AEN spike rates by 1.7 Hz (0.8 – 2.7;  $n=27$  cells) in the initial stimulus period relative to the prestimulus period ( $W = 8$ ;  $p < 0.001$ ;  $n=27$  cells) (Fig. 4A).

After repeated pairing of the stimulus with a behavioral cue we found, first, that the stimulus-driven response had decreased (Fig 4A). Over the population of AENs tested in the paired experimental condition, spike rates decreased significantly during the stimulus period by 0.5 Hz (0.9 – 0.1) (Fig. 4A;  $W = 98$ ;  $p = 0.03$ ;  $n=27$  cells), though these rates were still elevated by 1.1Hz (0.3 – 1.8) compared to the prestimulus period ( $W = 17$ ;  $p<0.001$ ;  $n=27$  cells). And, second, that when we then withheld the stimulus, the AEN spike rates in the poststimulus period had decreased significantly relative to the prestimulus period by 0.3 Hz (0.7 – +0.1) (Fig. 4A;  $W = 80$ ;  $p=0.009$ ;  $n=27$  cells). This effect is also readily observed in the example spike rasters depicted in Figs. 3&5. These results are consistent with the generation of a cancellation signal, and are not likely explained by changes to afferent input. Afferents fired more regularly than AENs in the prestimulus period at 7.4Hz (2.1 - 15;  $n=9$ ). As shown in the example cell of Fig. 3C, the mechanosensory stimulus modulated afferent spiking activity. However, when averaged across each trial, spike rates were not changed significantly either by the stimulus or during or after the stimulus period (data not shown). Based on extensive work on the adaptive filter model in the electrosensory and auditory systems, one expects that this observed change in AEN responses after the stimulus period would depend on coupling between the stimulus and a movement-related signal (conveyed by parallel fiber inputs to AENs) (Bell, 1981, Bodznick and Montgomery 1999, Zhang and Bodznick 2008, Singla et al, 2017). For a subset of these AENs ( $n = 5/27$  cells), we performed an additional iteration of the experiment in which the trials were yoked to an internal computer clock ('freerun' condition) rather than the animal's own behavior. Only in the paired condition did all five AENs exhibit decreased spike rates in the poststimulus period relative to the prestimulus period (Fig. 4B; same cells as those in the analysis corresponding to Fig. 5D) (paired condition:  $W=0$ ; critical  $W$  at  $p<0.05 = 0$  for  $n=5$  cells; freerun condition:  $W=7$ ; critical  $W$  at  $\alpha(0.05) = 0$  for  $n=5$  cells). Specifically, the poststimulus spike rates were lower in the paired relative the freerun condition in 4/5 of these cells. Together, these results are consistent with the development of a cancellation signal for the stimulus-driven response as a result of stimulus pairing with movement-related signals. However, changes to the overall spike rate of AENs could be

explained by other factors such as neural fatigue. Although a comparison between freerun and paired conditions would rule out this alternative explanation of the results, with a sample size of  $n=5$  it is difficult to make a strong conclusion from this result alone. Importantly, changes to the temporal profile of the AEN spiking response are equally as important to changes in its magnitude when assessing the generation of a cancellation signal / negative image.

Temporal specificity is an important component of predictive cancellation via an adaptive filter mechanism that distinguishes it from other potential non-plastic gating mechanisms. In the adaptive filter mechanism, the cancellation signal should be specific to the phase of the stimulus response relative to the onset of a movement or behavior. As observed in the example spike raster plots (Fig4&5), the stimulus-driven responses were inhomogeneous in time yet specific, with a repeatable unique temporal profile. For example, Fig3A shows data from an AEN in which we were able to repeat a second iteration of the pairing experiment in which the phase of the stimulus-driven response was explicitly shifted by shifting stimulus onset on each trial. As seen in this example cell, the shift in the phase of the stimulus response resulted in a similar shift in the phase of a temporally patterned poststimulus response. This behavior would be consistent with predictive cancellation by an adaptive filter mechanism, but not with other mechanisms such as fixed gating by inhibitory efference. Importantly, time-locked changes in the temporal profile of the post-stimulus spiking response that are specific to the phase of the stimulus-driven response cannot be explained by generalized synaptic or neural fatigue. We were only able to achieve an explicit phase-shifted iteration of the experiment in two of the total 27 AENs. However, we implemented two analytic methods to assess the temporal specificity of cancellation signals in all of the 27 AENs of the study.

First, to examine whether the observed poststimulus changes in AEN spike rate (Fig. 4A) preserved the temporal specificity of the stimulus-driven response, we estimated the trial-averaged spike rate per 200msec bin in each period of the experiment in each cell (Fig. 4C&D). We then aligned responses across cells according to the bin in which the maximum stimulus-driven spike rate was evoked. In the stimulus period, spike rates in this center bin were initially 10Hz (6.3--13;  $n=27$  cells) above prestimulus rates ( $W=0$ ;  $p<0.001$ ;  $n=27$  cells). Consistent with the previous results, the peak stimulus-driven spike rates decreased significantly by 1.1Hz (3.5 -- +0.3;  $n=27$  cells) by the end of the stimulus period (Fig. 4C; center bin:  $W = 96$ ;  $p = 0.025$ ;  $n = 27$  cells). As would be predicted by a temporally specific cancellation mechanism, we found that the poststimulus response was decreased relative to the prestimulus response only in the bins including and immediately surrounding the peak stimulus-driven response (Fig. 4C; center bin: -0.6Hz (-1.2 -- -0.2);  $W = 65$ ;  $p = 0.003$ ;  $n = 27$  cells). Across the afferent population, peak stimulus-driven spike rates were also significantly elevated above prestimulus rates by 7.7Hz (7.3, 9.9) in the center bin ( $W=0$ ; critical  $W$  at  $\alpha(0.05) = 6$  for  $n=9$ ; Fig. 4D). However, this response did not decrease significantly by the end of the stimulus period

(center bin: -1.7Hz, -2.6 -- -0.3;  $W = 9$ ; critical  $W$  at  $\alpha(0.05) = 6$  for  $n=9$ ). Finally, unlike AENs, afferents exhibited no difference between the poststimulus spiking response and the prestimulus spiking response in this (or any other) bins (Fig. 4D; center bin: -0.1Hz, -2.4 -- +0.2;  $W = 17$ ; critical  $W$  at  $\alpha(0.05) = 6$  for  $n=9$ ). These results indicate that changes in AEN spike rate cannot be accounted for by changes in the afferent input. These results are consistent with the generation of a cancellation signal within AENs themselves.

The adaptive filter cancellation mechanism achieves temporal specificity due to the de-correlating effects of anti-Hebbian plasticity with relatively high temporal precision. Consequently, as shown extensively in the electrosensory systems, poststimulus spiking responses are negatively correlated with the stimulus-driven response after a period of stimulus pairing with behavior/movement-related signals. This negatively correlated poststimulus response is therefore termed the *negative image* (Bell, 1981; Bodznick and Montgomery, 1994; Bastian, 1996). The analysis shown in Fig. 4C reveals coarsely that, at a population level, the poststimulus response is negatively correlated with the stimulus-driven response in the population of MON AENs examined here. We examined this more directly and with higher temporal resolution on a cell-by-cell basis by testing whether the poststimulus spiking response was more negatively correlated with the stimulus response than the prestimulus response had been.

We preserved the pattern of spike times by estimating an instantaneous spike density function (Fig5A&B; refer to Methods for more detail). We then measured the Spearman's correlation between 1) the prestimulus response and the stimulus response and 2) the poststimulus response and the stimulus response. Within each cell, we compared the correlation between the poststimulus response and the stimulus response to the correlation between the prestimulus response and the stimulus response. In the paired condition, just as predicted, AENs had a poststimulus response that was more negatively correlated with the stimulus response than it was prestimulus (Fig5C; difference in correlation =  $-0.18$  ( $-0.52 - -0.03$ );  $W = 80$ ;  $p=0.009$ ;  $n=27$  cells). Afferents exhibited no change in the correlation with the stimulus response between the post and prestimulus periods (Fig5C; difference in correlation =  $0$  ( $-0.13 - +0.5$ );  $W = 18$ ; critical  $W$  at  $\alpha(0.05)=8$  for 9 cells). For the subset of AENs tested in both the paired and the freerun experimental condition (5 out of the 27 AENs), the poststimulus response was more negatively correlated to the stimulus response in the paired condition than in the freerun condition in all 5/5 cells (Fig5D;  $W = 0$ ; critical  $W$  at  $\alpha(0.05) = 0$  for  $n=5$ ; same 5 cells as those in the analysis corresponding to Fig4B). Under the freerun condition, the AENs were prevented from forming their negative image of the stimulus response. In other words, yoking an external stimulus to a behavioral signal led to a post-pairing response in AENs that was like a negative image of the stimulus response, and this effect was specific to the AEN population. Importantly, a time-locked change in the 'shape' (temporal profile) of the post-pairing spiking

response that mirrors the stimulus-evoked response cannot be explained by fatigue.

Together, these results are consistent with a model in which anti-Hebbian plasticity enables the parallel fiber system to act as an adaptive filter, tuned through experience, to form a forward model of the reafference, also termed a *cancellation signal*, that cancels AEN responses to the reafference without gating out sensory input from other sources.

## DISCUSSION

The central nervous system of all major groups of craniates except reptiles and birds includes both a cerebellum and structures with circuitry that is similar to the cerebellum. As described in numerous papers and reviews, studies of electrosensory cerebellum-like structures have provided a relatively clear mechanistic account of how this circuitry can learn predictions of sensory reafference based on a variety of central reference signals and then use those predictions to cancel responses to reafference from the system (Bell et al., 1997a; Bell et al., 2008; Sawtell, 2017). That the stereotyped cerebellum-like circuit performs this function in phylogenetically well-separated as well as independently evolved electrosensory systems suggests that the cerebellum-like circuit is what endows this fundamental computation to these structures (Bullock et al 1983). Consistent with this, recent work shows that the cerebellum-like circuit in the dorsal cochlear nucleus performs the same function for the auditory system, canceling sound associated with the animal's own licking behavior (Singla et al 2017). The cerebellum-like mechanosensory lateral line nucleus (MON -- medial octavolateralis nucleus) of fishes is possibly the most ancestral of these structures and may have been the starting point of cerebellar evolution (Hibi et al., 2017; Machold and Fishell, 2005; Montgomery et al., 2012; Murakami et al., 2005; Pose-Mendez et al., 2016; Sugahara et al., 2017; Wang et al., 2005). The results we report here support a role for the MON in predictive cancelation of reafference consistent with, and dependent on, the characteristic cerebellum-like circuitry shared with electrosensory and auditory systems.

We found that MON output cells (AENs -- Ascending Efferent Neurons) decreased their response to a mechanosensory stimulus that was time-locked to respiratory and fin movement signals, while lateral line afferents projecting to MON continued to convey their sensory response. Although complete cancelation was not observed in these experiments (even after 45 minutes of pairing in a few cases), AENs responded with a negative image of the mechanosensory response once the previously-paired stimulus was withheld. This generation of a negative image to predictable sensory stimuli is the critical signature for the adaptive filter mechanism, which cancels that sensory input (Sawtell, 2017). Across the population, AENs generated negative images of sensory-evoked responses that were time-locked to movement-related signals, while afferents did not. Poststimulus AEN activity was not affected by the same mechanosensory stimulus if it was presented uncoupled from movement-related



signals. We did not investigate why or how receptive fields of different AENs were better driven by one or the other of these two stimulus variants. In future studies this could be interesting to unpack, as it might indicate functional subclasses in the AEN population.

Though the effects reported here are statistically significant, it is of course difficult to know what ‘effect sizes’ would be functionally relevant in the MON circuit. Various circuit and cellular factors may constrain the amount of cancellation each individual AEN is able to achieve as well as its temporal precision. However, circuit-level mechanisms (such as synaptic pooling) may improve the ability of the ascending lateral line system to more effectively cancel the effects of reafference than any one individual cell in that system. In the future, it will be important to interrogate specific physiological constraints in this system (such as the specific spike timing dependent plasticity rules at the parallel fiber synapse). In combination with computational modeling techniques, this would lead to a better understanding of the theoretical constraints imposed on the cancellation in individual neurons and potential hypotheses about circuit mechanisms that could overcome such constraints.

The effect sizes measured in this study may also be skewed by AENs that don’t generate negative images, though there did not appear to be a bimodal split in effects among the population of AENs examined here (Fig 4A&C and Fig 5C). From past studies we know that generally only 55–65% of electrosensory AENs in the dorsal nucleus in skates appear to exhibit the ability to generate negative images to predictable sensory input (Zhang and Bodznick, 2008). Anatomically, in the MON two distinct populations of AENs can be identified, one of which forms a deeper layer called “cell plate X,” and both populations were likely included in this study (Schmidt and Bodznick 1984). It will be interesting in future work to identify whether AENs from these two populations differ systematically in their ability to generate negative images.

The *cancellation signal* is the phenomenon that underlies the generation of a negative image to the induced stimulus pattern at stimulus offset. Although the development of a negative image to sensory responses implies the formation of a cancellation signal in the AEN, it cannot be directly measured with extracellular techniques. Future work aimed at studying this cancellation signal directly will require intracellular recordings. Additionally, future work implementing intracellular measurements and manipulation of individual AEN membrane potentials would enable direct comparisons between the mechanisms of synaptic plasticity in the MON and those established in other cerebellum-like structures.

The elegance of the cerebellum-like circuit is that a small set of biophysical rules generates a high-level function that enables organisms to more efficiently interact with their environment. The cerebellum-like circuit can be described as an adaptive filter (Dean and Porrill, 2011; Fujita, 1982;



Montgomery and Bodznick, 1994). And the computation performed by the cerebellum-like circuit is well suited to any function in which an adaptive filter is appropriate. In the electrosensory, auditory, and (as demonstrated by the results presented here) mechanosensory systems, the adaptive filter in the first-order cerebellum-like sensory structures learns a forward model that is the negative image of any sensory input predicted by granule cell responses (the filter's basis set), which includes signals related to the animal's own behavior. Functionally, the adaptive filter would enhance sensory processing in these sensory systems by eliminating refference while maintaining sensitivity to externally generated sensory signals, which has been demonstrated in the mormyrid electrosensory lobe (Enikolopov et al., 2018). Critically, the specific function of a cerebellum-like circuit will depend on its inputs and outputs. Theoretical studies have described how an adaptive filter can form the basis for, *inter alia*, forward models, which have been useful in developing hypotheses about the role of the cerebellum proper in the context of a wide range of behavior (Ebner and Pasalar, 2008; Machado et al., 2015; Wolpert and Ghahramani, 2000). Ultimately, understanding cerebellar contributions to a remarkable diversity of behavior may best be understood from an evolutionary perspective (Montgomery and Bodznick, 2016; Perks and Montgomery, 2019).

Comparisons between the anatomy/physiology of the MON and the cerebellum can facilitate hypotheses about how the functionality of the cerebellum developed from its phylogenetic precursors (of which the MON is likely the most ancestral form) (Montgomery et al., 2012). The key feature that endows all cerebellum-like structures with their adaptive filter capability is plasticity at the synapses between the apical dendritic arbor of the output cells and the parallel fiber system. One key difference between the MON and the mammalian cerebellum is that output cells of MON (AENs) are excitatory, while those of the mammalian cerebellum (Purkinje cells) are inhibitory. Output cells (eurodendroid cells) of the teleost cerebellum are excitatory, but this structure also contains inhibitory interneurons (named medium ganglion cells) that have elaborate dendritic arbors contacted by plastic parallel fiber synapses in the molecular layer (Han and Bell, 2003). Interestingly, excitatory output cells of the deep nuclei in mammalian cerebellum are contacted by a plastic synapse originating from the same mossy fiber inputs that innervate granule cells providing parallel fibers to cerebellar cortex (Gao et al., 2012; Mauk et al., 2014). It remains an open question what functional differences these anatomical differences provide to the systems in which they occur. Variation among cerebellum-like structures and the cerebellum in the composition and size of their granular cell domains likely underlie functional differences in their performance and implementation (Bratby et al., 2017a, b; Kennedy et al., 2014). Continued comparative studies among these structures will likely help unpack the impact that such differences have on the operation of the cerebellum-like circuit in different systems, including the cerebellum itself.

Studies on cerebellar origins and on the functions of cerebellum-like circuits highlight its sustained importance throughout vertebrate evolution. Yet the function of the cerebellum remains hotly debated. Together, the results presented here provide strong support for the model of a conserved computation implemented by cerebellum-like circuits across vertebrates. Continued examination of: 1) diversity among cerebellum-like structures, 2) their evolutionary relationship, and 3) differences among the sensory systems they serve, scaffolds an evolutionary perspective on understanding how this conserved computation enables such diverse functions of the cerebellum in vertebrate neuroethology.

#### LIST OF SYMBOLS AND ABBREVIATIONS

AEN – ascending efferent neuron

ELL – electrosensory lobe

MON – medial octavolateralis nucleus

PF – parallel fiber

#### ACKNOWLEDGEMENTS

This work was supported by National Science Foundation and Wesleyan Institutional grants to D.B.. Funding for K.P. while performing these experiments came in part from HHMI summer research fellowship. A.K. was supported in part by a Wesleyan University Summer Research Fellowship. Data collected by K.P. was previously presented in thesis format (Perks, 2007). We would like to thank Mr. Billy Klem, Mr. Danny Sullivan and Mr. Eddie Enos at the Marine Biological Laboratory and the crew of the Environmental Lab at the Dominion Nuclear Plant in CT for collecting skates. We would like to thank Dr. John Montgomery for his continued feedback.

#### COMPETING INTERESTS

None to declare.

#### DATA AVAILABILITY

All data and analysis code (in open source Python format) pertaining to this study are available via the web-based repository G-Node [*this repository will be made public with an associated DOI upon acceptance for publication. For now, analysis routines and raw results have been uploaded with this submission as supplemental material for review if desired*] or from the corresponding author upon reasonable request.

## REFERENCES

- Ayali, A., Gelman, S., Tytell, E.D., Cohen, A.H.** (2009). Lateral-line activity during undulatory body motions suggests a feedback link in closed-loop control of sea lamprey swimming. *Can. J. Zool.* **87**, 671-683.
- Bastian, J.** (1995). Pyramidal-cell plasticity in weakly electric fish: A mechanism for attenuating responses to reafferent electrosensory inputs. *J Comp Physiol* **176**, 63-78.
- Bastian, J.** (1996). Plasticity in an electrosensory system. I. General features of a dynamic sensory filter. *J Neurophysiol* **76**, 2483-2496.
- Bell, C., Bodznick, D., Montgomery, J., and Bastian, J.** (1997a). The generation and subtraction of sensory expectations within cerebellum-like structures. *Brain, Behavior and Evolution* **50**, 17-31.
- Bell, C.C.** (2002). Evolution of cerebellum-like structures. *Brain Behav Evol* **59**, 312-326.
- Bell, C.C., and Grant, K.** (1989). Corollary discharge inhibition and preservation of temporal information in a sensory nucleus of mormyrid electric fish. *J Neurosci* **9**, 1029-1044.
- Bell, C.C., Caputi, A., and Grant, K.** (1997). Physiology and plasticity of morphologically identified cells in the mormyrid electrosensory lobe. *J Neurosci* **17**, 6409-6423.
- Bell, C.C., Caputi, A., Grant, K., and Serrier, J.** (1993). Storage of a sensory pattern by anti-Hebbian synaptic plasticity in an electric fish. *Proc Natl Acad Sci U S A* **90**, 4650-4654.
- Bell, C.C., Finger, T.E., and Russell, C.J.** (1981). Central connections of the posterior lateral line lobe in mormyrid fish. *Exp Brain Res* **42**, 9-22.
- Bell, C.C., Han, V., and Sawtell, N.B.** (2008). Cerebellum-like structures and their implications for cerebellar function. *Annu Rev Neurosci* **31**, 1-24.
- Bell, C.C., Han, V.Z., Sugawara, Y., and Grant, K.** (1997b). Synaptic plasticity in a cerebellum-like structure depends on temporal order. *Nature* **387**, 278-281.
- Bertetto, L.** (2007). Functional synaptic plasticity in the electrosensory system of the little skate, *Raja erinacea*. *PhD dissertation*. Wesleyan University, Middletown, CT, USA.
- Bodznick, D.** (1989). Comparisons Between Electrosensory and Mechanosensory Lateral Line Systems. In *The Mechanosensory Lateral Line* (ed. S. Coombs, P. Gorner, H. and Munz), pp 653-678. New York, NY: Springer.
- Bodznick, D., and Northcutt, R.G.** (1980). Segregation of electro- and mechanoreceptive inputs to the elasmobranch medulla. *Brain Res* **195**, 313-321.
- Bodznick, D., and Schmidt, A.W.** (1984). Somatotopy within the medullary electrosensory nucleus of the little skate, *Raja erinacea*. *J Comp Neurol* **225**, 581-590.
- Bodznick, D., Montgomery, J.C., and Carey, M.** (1999). Adaptive mechanisms in the elasmobranch hindbrain. *J Exp Biol* **202**, 1357-1364.
- Boord, R.L., and Northcutt, R.G.** (1982). Ascending lateral line pathways to the midbrain of the clearnose skate, *Raja eglanteria*. *J Comp Neurol* **207**, 274-282.
- Bratby, P., Sneyd, J., and Montgomery, J.** (2017a). Computational Architecture of the Granular Layer of Cerebellum-Like Structures. *Cerebellum* **16**, 15-25.

- Bratby, P., Sneyd, J., and Montgomery, J.** (2017b). Sequential Pattern Formation in the Cerebellar Granular Layer. *Cerebellum* **16**, 438-449.
- Bullock, T.H., Bodznick, D.A., and Northcutt, R.G.** (1983). The phylogenetic distribution of electroreception: evidence for convergent evolution of a primitive vertebrate sense modality. *Brain Res* **287**, 25-46.
- Dean, P., and Porrill, J.** (2011). Evaluating the adaptive-filter model of the cerebellum. *J Physiol* **589**, 3459-3470.
- Ebner, T.J., and Pasalar, S.** (2008). Cerebellum predicts the future motor state. *Cerebellum* **7**, 583-588.
- Enikolopov, A.G., Abbott, L.F., and Sawtell, N.B.** (2018). Internally Generated Predictions Enhance Neural and Behavioral Detection of Sensory Stimuli in an Electric Fish. *Neuron* **99**, 135-146 e133.
- Finger, T.E., Bell, C.C., and Carr, C.** (1986). Comparisons among electroreceptive teleosts: why are the electrosensory systems so similar? In *Electroreception* (ed. T.H. Bullock, and W. Heiligenberg), pp. 465-481. New York: John Wiley & Sons, Inc.
- Fujita, M.** (1982). Adaptive filter model of the cerebellum. *Biol Cybern* **45**, 195-206.
- Gao, Z., van Beugen, B.J., and De Zeeuw, C.I.** (2012). Distributed synergistic plasticity and cerebellar learning. *Nat Rev Neurosci* **13**, 619-635.
- Han, V.Z., and Bell, C.C.** (2003). Physiology of cells in the central lobes of the mormyrid cerebellum. *J Neurosci* **23**, 11147-11157.
- Harvey-Girard, E., Lewis, J., and Maler, L.** (2010). Burst-induced anti-Hebbian depression acts through short-term synaptic dynamics to cancel redundant sensory signals. *J Neurosci* **30**, 6152-6169.
- Hibi, M., Matsuda, K., Takeuchi, M., Shimizu, T., and Murakami, Y.** (2017). Evolutionary mechanisms that generate morphology and neural-circuit diversity of the cerebellum. *Dev Growth Differ* **59**, 228-243.
- Hjelmstad, G., Parks, G., and Bodznick, D.** (1996). Motor corollary discharge activity and sensory responses related to ventilation in the skate vestibulolateral cerebellum: implications for electrosensory processing. *J Exp Biol* **199**, 673-681.
- Kennedy, A., Wayne, G., Kaifosh, P., Alvina, K., Abbott, L.F., and Sawtell, N.B.** (2014). A temporal basis for predicting the sensory consequences of motor commands in an electric fish. *Nat Neurosci* **17**, 416-422.
- Kim, A.J., Fitzgerald, J.K., and Maimon, G.** (2015). Cellular evidence for efference copy in Drosophila visuomotor processing. *Nat Neurosci* **18**, 1247-1255.
- Kim, A.J., Fenk, L.M., Lyu, C., and Maimon, G.** (2017). Quantitative Predictions Orchestrate Visual Signaling in Drosophila. *Cell* **168**, 280-294 e212.
- Machado, A.S., Darmohray, D.M., Fayad, J., Marques, H.G., and Carey, M.R.** (2015). A quantitative framework for whole-body coordination reveals specific deficits in freely walking ataxic mice. *eLife* **4**:e07892.
- Machold, R., and Fishell, G.** (2005). Math1 is expressed in temporally discrete pools of cerebellar rhombic-lip neural progenitors. *Neuron* **48**, 17-24.

- Mauk, M.D., Li, W., Khilkevich, A., and Halverson, H.** (2014). Cerebellar mechanisms of learning and plasticity revealed by delay eyelid conditioning. *Int Rev Neurobiol* **117**, 21-37.
- Mensinger, A. F., Van Wert, J. C., Rogers, L. S.** (2018). Lateral line sensitivity in free-swimming toadfish *Opsanus tau*. *Journal of Experimental Biology*, **222**:jeb190587.
- Milton, R. C.** (1964). An extended table of critical values for the Mann-Whitney (Wilcoxon) two-sample statistic. *Journal of the American Statistical Association*, **59**(307), 925-934.
- Montgomery, J.C., and Bodznick, D.** (1994). An adaptive filter that cancels self-induced noise in the electrosensory and lateral line mechanosensory systems of fish. *Neurosci Lett* **174**, 145-148.
- Montgomery, J., & Bodznick, D.** (2016). *Evolution of the Cerebellar Sense of Self*. Oxford University Press.
- Montgomery, J.C., Bodznick, D, and Halstead, M.B.D.** (1996). Hindbrain signal processing in the lateral line system of the dwarf scorpionfish *Scopelogadus papillatus*. *Journal of Experimental Biology*, **199**(4), 893-899.
- Montgomery, J.C., Bodznick, D., and Yopak, K.E.** (2012). The cerebellum and cerebellum-like structures of cartilaginous fishes. *Brain Behav Evol* **80**, 152-165.
- Muller, S.Z., Zadina, A.N., Abbott, L.F., and Sawtell, N.B.** (2019). Continual learning in a multi-layer network of an electric fish. *Cell* **179**, 1382-1392.
- Murakami, Y., Uchida, K., Rijli, F.M., and Kuratani, S.** (2005). Evolution of the brain developmental plan: Insights from agnathans. *Dev Biol* **280**, 249-259.
- Nelson, M.E., and Paulin, M.G.** (1995). Neural simulations of adaptive reafference suppression in the elasmobranch electrosensory system. *J Comp Physiol A* **177**, 723-736.
- New, J.G., Coombs, S., McCormick, C.A., and Oshel, P.E.** (1996). Cytoarchitecture of the medial octavolateralis nucleus in the goldfish, *Carassius auratus*. *J Comp Neurol* **366**, 534-546.
- Oertel, D., and Young, E.D.** (2004). What's a cerebellar circuit doing in the auditory system? *Trends Neurosci* **27**, 104-110.
- Palmer, L.M., and Mensinger, A.F.** (2005). Sensitivity of the anterior lateral line to natural stimuli in the oyster toadfish, *Opsanus tau*, (Linnaeus). *J. Exp. Biol.* **208**, 3441-3450.
- Perks, K.E., and Montgomery, J.C.** (2019). Understanding cerebellum in vertebrate neuroethology: from sensing in sharks and electric fish to motor sequences in movement and bird song. *Behavioral Neuroscience*. **133**(3), 267-281.
- Perks, K.E.** (2007). Adaptive sensory filtering in the cerebellar-like mechanosensory nucleus of the hindbrain in *Raja erinacea*. *Masters Thesis*. Wesleyan University, Middletown, CT, USA. Retrieved from [wescholar.wesleyan.edu/etd\\_mas\\_theses/6/](http://wescholar.wesleyan.edu/etd_mas_theses/6/)
- Pose-Mendez, S., Candal, E., Mazan, S., and Rodriguez-Moldes, I.** (2016). Morphogenesis of the cerebellum and cerebellum-related structures in the shark *Scyliorhinus canicula*: insights on the ground pattern of the cerebellar ontogeny. *Brain Struct Funct* **221**, 1691-1717.
- Poulet, J.F., and Hedwig, B.** (2003). Corollary discharge inhibition of ascending auditory neurons in the stridulating cricket. *J Neurosci* **23**, 4717-4725.
- Requarth, T., and Sawtell, N.B.** (2014). Plastic corollary discharge predicts sensory consequences of movements in a cerebellum-like circuit. *Neuron* **82**, 896-907.

- Roberts, B.L., and Russell, I.J.** (1972). The activity of lateral-line efferent neurones in stationary and swimming dogfish. *J Exp Biol* **57**, 435-448.
- Roberts, P.D., and Bell, C.C.** (2000). Computational consequences of temporally asymmetric learning rules: II. Sensory image cancellation. *J Comput Neurosci* **9**, 67-83.
- Russell, I.J.** (1971). The role of the lateral-line efferent system in *Xenopus laevis*. *J Exp Biol* **54**, 621-641.
- Russell, I.J., and Roberts, B.L.** (1974). Active reduction of lateral line sensitivity in swimming dogfish. *J. Comp. Physiol.* **94**, 7-15.
- Sawtell, N.B.** (2017). Neural Mechanisms for Predicting the Sensory Consequences of Behavior: Insights from Electrosensory Systems. *Annu Rev Physiol* **79**, 381-399.
- Schmidt, A.W., and Bodznick, D.** (1987). Afferent and efferent connections of the vestibulolateral cerebellum of the little skate, *Raja erinacea*. *Brain Behav Evol* **30**, 282-302.
- Shimazaki, H., and Shinomoto, S.** (2010). Kernel bandwidth optimization in spike rate estimation. *J Comp Neuro* **29**(1-2), 171-182.
- Singla, S., Dempsey, C., Warren, R., Enikolopov, A.G., and Sawtell, N.B.** (2017). A cerebellum-like circuit in the auditory system cancels responses to self-generated sounds. *Nat Neurosci* **20**, 943-950.
- Sugahara, F., Murakami, Y., Pascual-Anaya, J., and Kuratani, S.** (2017). Reconstructing the ancestral vertebrate brain. *Dev Growth Differ* **59**, 163-174.
- Suriano, C.M., and Bodznick, D.** (2018). Evidence for generative homology of cerebellum and cerebellum-like structures in an elasmobranch fish based on Pax6, Cbln1 and Grid2 expression. *J Comp Neurol* **526**(14), 2187-2203.
- Wang, V.Y., Rose, M.F., and Zoghbi, H.Y.** (2005). Math1 expression redefines the rhombic lip derivatives and reveals novel lineages within the brainstem and cerebellum. *Neuron* **48**, 31-43.
- Wolpert, D.M., and Ghahramani, Z.** (2000). Computational principles of movement neuroscience. *Nat Neurosci* **3 Suppl**, 1212-1217.
- Yger P., Spampinato, G.L.B, Esposito E., Lefebvre B., Deny S., Gardella C., Stimberg M., Jetter F., Zeck G. Picaud S., Duebel J., Marre O.** (2018). A spike sorting toolbox for up to thousands of electrodes validated with ground truth recordings in vitro and in vivo. *eLife* **7**:e34518.
- Zhang, Z., and Bodznick, D.** (2008). Plasticity in a cerebellar-like structure: suppressing reafference during episodic behaviors. *J Exp Biol* **211**, 3720-3728.
- Zhang, Z., and Bodznick, D.** (2010). The importance of N-methyl-D-aspartate (NMDA) receptors in subtraction of electrosensory reafference in the dorsal nucleus of skates. *J Exp Biol* **213**, 2700-2709.



## FIGURES

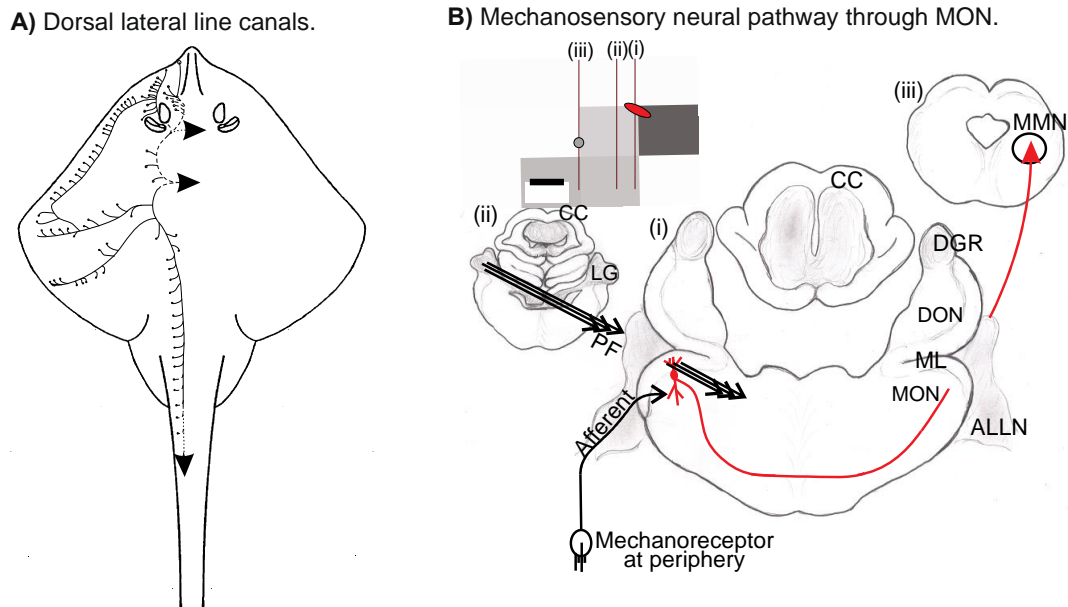

**Figure 1.** Lateral line system and the **central connections of the cerebellum-like nucleus**. A) A drawing of the lateral line canals on the dorsal side of the skate. Canals were visualized by injection of cobalt blue at intermittent locations along the canal. Canals are represented by lines and terminate in dots, which denote canal pores. Dotted lines denote inferred continuity between well-visualized segments of canal. B) Diagram of the pathway for connections to/from the medial octavolateral nucleus (MON) across three representative coronal sections (i, ii, and iii) of the brain (not to scale). A cartoon AEN (ascending efferent neuron) with its apical and basal dendrites and its axon colored in red. Parallel fibers (PF) originate from granule cells in lateral granular area (LG) and course through the molecular layer (ML) of MON. Mechanosensory afferents enter MON via the anterior lateral line nerve (ALLN). CC, corpus cerebelli; DGR, dorsal granular ridge; DON, dorsal octavolateral nucleus; MMN, medial mesencephalic nucleus.





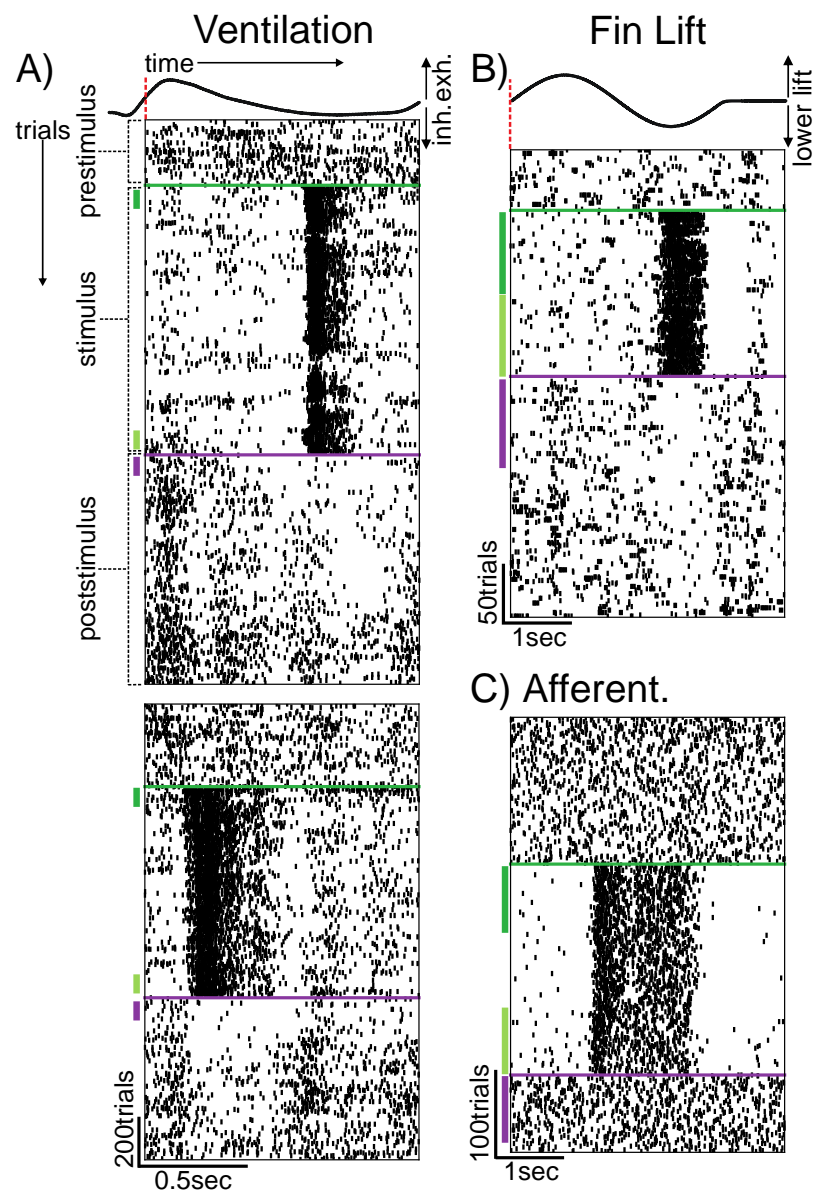

**Figure 3. Experimental design and example data.**

A) Raster display of the spiking activity (each spike is a tick mark) of an AEN during a paired experimental condition in which each trial (row) is triggered by the respiratory movements of ventilation. The average inhalation-exhalation (Inh.-Exh.) cycle on each trial is plotted above the raster and the trial onset at  $t=0$  is denoted by a red line. An experiment has three periods as labelled in the top panel: prestimulus, stimulus (begins at the green horizontal line, ends at purple), and poststimulus (begins at the purple horizontal line). During the stimulus period a mechanosensory stimulus is presented on each trial that modulates spiking activity (initial stimulus period = dark green vertical bar; final stimulus period = light green vertical bar). Removal of the mechanosensory stimulus at the end of the stimulus period reveals a spiking pattern in the initial trials of the poststimulus period (vertical purple bar) that looks like a negative image of the stimulus-driven response. Later in the

poststimulus period, spiking activity again resembles the prestimulus period. Bottom panel: A second iteration of the pairing experiment was then performed in the same cell in which the stimulus and the corresponding stimulus-driven spiking response was shifted in phase relative to trial onset. It appears that, in each pairing experiment, the phase of negative image is specific to the the phase of the stimulus-driven response. B) Same as the top panel of A, but for a pairing experiment in a different AEN in which each trial is triggered by the onset of the externally imposed fin lift cycle (top trace above raster). C) Same as in B but for an afferent fiber.

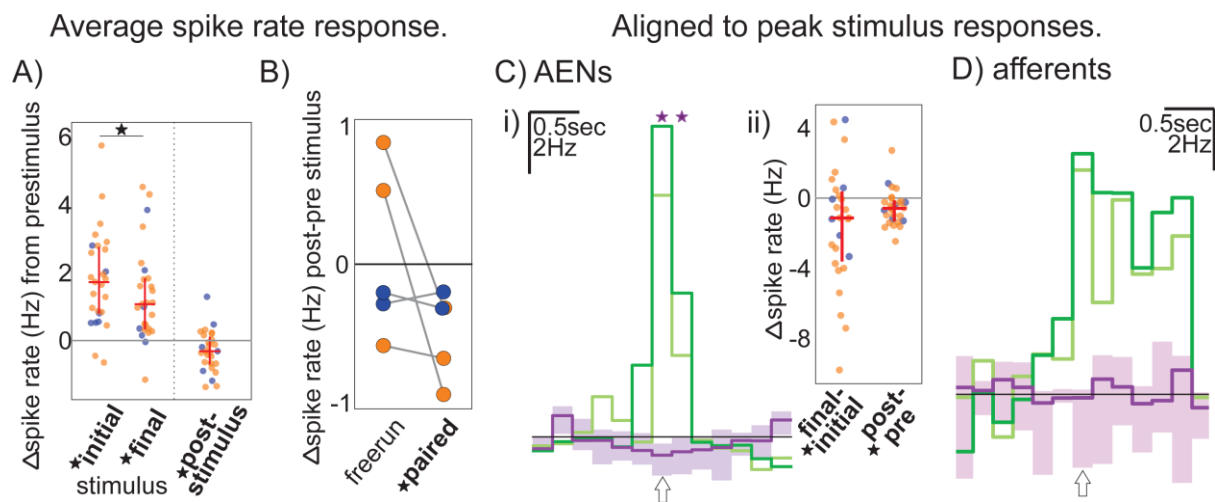

**Figure 4. Stimulus pairing induces changes in AEN spike rates that oppose the stimulus response.**

A) Scatter plot of the spike rate in each of 27 AENs in the paired experimental condition during the stimulus period (initial and final) and the poststimulus period. Spike rates are relative to those in the prestimulus period for each cell. Data are colored by the trigger source (orange = ventilation; blue = fin lift). Red lines depict the median (the location of the horizontal line on the y-axis) and the IQR (Q1-Q3; the span of the vertical line) of each distribution. Starred bold labels indicate that the rates in that period were significantly different than the prestimulus rates ( $p < 0.05$ ;  $n = 27$ ; Wilcoxon two-tailed within-cell comparisons as described in main text). Mechanosensory stimulation drove a net increase in spike rates that declined over the course of pairing (starred line indicates significance at  $p < 0.05$  by the Wilcoxon two-tailed test between the final and initial stimulus period as described in main text). Critically, AENs spike rates decreased significantly in the early poststimulus period, which is consistent with the generation of a cancellation signal for the stimulus-driven response. B) Scatter plot showing data from the 5 AENs in which *both* a paired and a freerun experiment were conducted in the same cell (these are a subset of the 27 cells shown in A). Spike rates in 4/5 of these AENs were more decreased in the paired versus the freerun experimental condition (same cells as those shown in Fig. 5D; orange = ventilation triggered; blue = fin lift triggered). Starred bold label indicates that the poststimulus rates were significantly different from the prestimulus rates in the paired condition (poststimulus rates were reduced in all 5/5 of these AENs in the paired condition;  $W = 0$  by Wilcoxon two-tailed test; critical  $W$  at  $\alpha(0.05) = 0$  for  $n = 5$ ). C) Changes in poststimulus spike rates were temporally specific (and opposing) to changes in stimulus-driven spike rates. i) Histogram of the mean trial-averaged spike rate of AENs (200msec bins) in each period (dark green = initial stimulus period; light green = final stimulus period; purple = poststimulus period; shading in purple denotes the IQR for poststimulus responses in each bin) ( $n = 27$  cells). For each cell, the trial-averaged prestimulus spike rates were subtracted and responses were aligned at  $t = 0$  (arrow) to the bin in which the

maximum stimulus-driven response was evoked. Bins in which the poststimulus spike rate was significantly decreased relative to prestimulus rates are denoted by a purple star ( $p < 0.001$ ; Wilcoxon two-tailed within-cell comparisons as described in main text). ii) Scatter plot of the population data corresponding to the center bin (arrow) ( $n = 27$  cells). Spike rates decreased significantly over the course of stimulus pairing (final-initial) and spike rates were significantly decreased in the poststimulus period relative to the prestimulus period (post-pre). D) Same as in C but for the afferent population ( $n = 9$  cells). Poststimulus spike rates were not different from prestimulus rates in any of the bins. A-D) For all comparisons, individual cells are considered independent samples. For each condition (paired or freerun; ventilation or fin lift), data are from one experiment per cell.

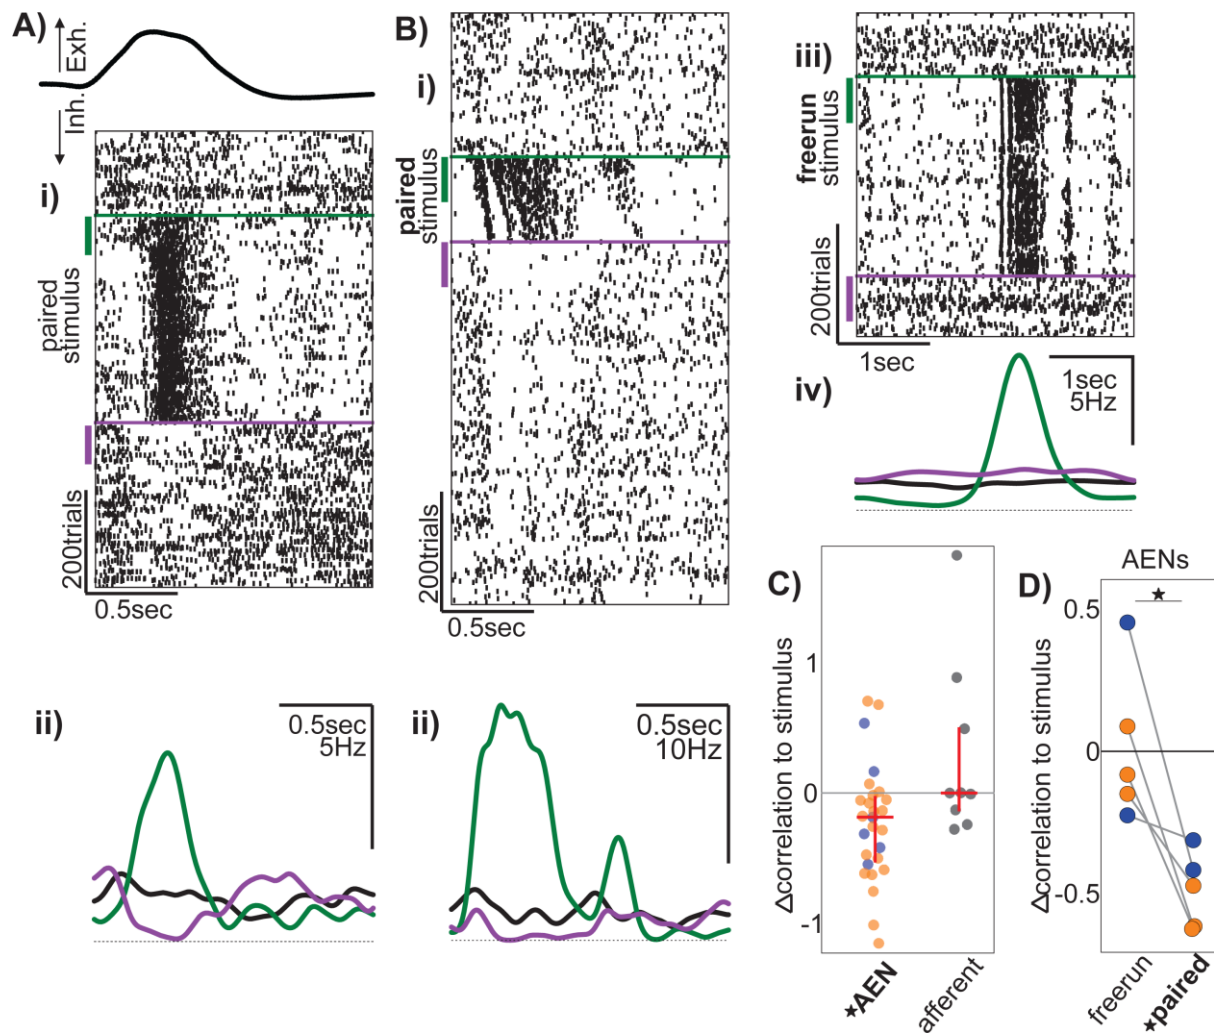

**Figure 5. AENs generate negative images to stimulus responses that are paired with movement-related signals.** A) (i) As in Fig3, raster display of AEN spiking under the paired experimental condition triggered by the ventilatory movements (top trace). (ii) Smoothed trial-averaged spiking response is plotted for each period: black = prestimulus, green = stimulus (initial), and purple = poststimulus (see Methods for detail). Dotted line denotes a spike rate of 0Hz. Note: poststimulus activity resembles a negative image (inverse) of the stimulus-driven response and approaches 0Hz during the time the stimulus-evoked response was strongest. B) i) & ii) Same plots as in A but for a different AEN. iii) & iv) Same AEN as in i&ii, but under freerun experimental condition in which each trial is triggered by a regular clock interval (desynchronized from ventilation). Under this freerun condition the poststimulus response is similar to the prestimulus response. C) For AENs, but not afferents, the stimulus response tended to be more negatively correlated with the poststimulus response than with the prestimulus response (orange = ventilation trigger; blue = fin lift trigger). Scatterplot of the data for all AENs (n=27 cells) and for all afferents (n=9) tested in the paired experimental condition (change in correlation to stimulus = poststimulus:stimulus correlation minus

prestimulus:stimulus correlation). Starred bold labels indicate a significant change for AENs ( $p < 0.05$ ;  $n = 27$ ; Wilcoxon two-tailed within-cell comparisons as described in main text). D) Scatter plot of the change in stimulus correlation for the paired and the freerun experimental condition in the subset of 5/27 AENs tested under both conditions (same cells as those shown in Fig. 4B; orange = ventilation trigger; blue = fin lift trigger). Starred line denotes a significant effect of experimental condition (in all 5/5 of these AENs, the poststimulus response was more negatively correlated to the stimulus response in the paired versus the freerun condition;  $W = 0$  by Wilcoxon two-tailed test; critical  $W$  at  $\alpha(0.05) = 0$  for  $n = 5$ ). Starred bold label indicates that the poststimulus correlation was significantly different from the prestimulus correlation in the paired condition (the poststimulus correlations was reduced in all 5/5 of these AENs in the paired condition;  $W = 0$  by Wilcoxon two-tailed test; critical  $W$  at  $\alpha(0.05) = 0$  for  $n = 5$ ). C&D) For all comparisons, individual cells are considered independent samples. For each condition (paired or freerun; ventilation or fin lift), data are from one experiment per cell.
